# Supplementary material for: Identity-based linear homomorphic signature for a restricted combiners’ group for e-commerce
Source: PeerJ journal article supplement (doi:10.7717/peerj-cs.3068), 2025-08-04
Supplement: proof1.pdf [file proof1.pdf]

## Confidentiality Proof

In this section, we will prove the confidentiality of the scheme under adaptive chosen message attacks in the random oracle model. We use the challenge-response mode for the proof. Let the challenger be denoted as  $\mathcal{C}$ , the adversary as  $\mathcal{A}$ , and the number of queries to the random oracle as  $q$ .

**Initialization.** The challenger  $\mathcal{C}$  initializes the public parameters and master secret key as described in the initialization phase.

**Random Oracle Queries.** The adversary  $\mathcal{A}$  adaptively queries the random oracle  $O_H$ . The challenger responds to these queries as follows:

- For each query  $H(m)$ , if  $m$  is already in the query table, return the stored value. Otherwise, randomly select a value from  $\mathbb{G}_1$  and return it, storing the result in the query table.
- For each query to the vector value, if the vector is already in the query table, return the stored value. Otherwise, randomly select a value and return it, storing the result in the query table.
- For each query to the session key, if the session key is already in the query table, return the stored value. Otherwise, randomly select a value and return it, storing the result in the query table.

**Signature Queries.** The adversary  $\mathcal{A}$  can request signatures on chosen messages. The challenger responds by generating the signatures as described in the signature phase.

**Output Phase.** The adversary  $\mathcal{A}$  outputs a guess for the  $ID$  associated with the message. The challenger  $\mathcal{C}$  checks if the guess is correct. If it is, the adversary wins the game.

The probability of the adversary  $\mathcal{A}$  winning the game is analyzed as follows:

- Let  $A$  be the event that  $\mathcal{A}$  wins the game.
- Let  $B$  be the event that the  $\mathcal{A}$ 's query is orthogonal to the challenge.

The probability of the adversary winning the game is given by:

$$Pr(A) = Pr(A|B) \cdot Pr(B) + Pr(A|\bar{B}) \cdot Pr(\bar{B}) \quad (1)$$

Since  $Pr(B)$  is negligible, and  $Pr(A|\bar{B})$  is also negligible, we can conclude that  $Pr(A)$  is negligible. Thus, the scheme is confidential under adaptive chosen message attacks in the random oracle model.

## Coalition-resistance Proof

### Phase 1: Initialization and User Registration

- **Challenger's Operations:**
  - Generates public parameters  $params$  and master private key  $msk = s$ .
  - For each user identity  $ID_i$  requested by the adversary, generates private key  $usk_{ID_i} = (x_i, R_i)$ , where  $x_i = r_i + s \cdot H_0(ID_i, R_i)$  and  $R_i = h^{r_i}$ .
- **Collusion Resistance Analysis:**
  - Even if the adversary obtains multiple users' private keys  $\{usk_{ID_i}\}$ , they cannot recover  $s$  through linear combinations due to the independence of  $r_i$  and the secrecy of  $s$  (relies on the hardness of the discrete logarithm problem).

### Phase 2: Combiner Permission Application

- **Challenger's Operations:**
  - Generates session keys  $b_{ID} = B \bmod q_{ID}$  for legitimate combiners and distributes them via CRT.
- **Collusion Resistance Analysis:**
  - If the adversary controls  $t'$  combiners with  $\{b_{ID_j}, q_{ID_j}\}_{j=1}^{t'}$  and  $t' < t$  (threshold),  $B$  cannot be recovered (CRT requires at least  $t$  pairwise coprime  $q_{ID}$ ).
  - If the adversary forges  $q_{ID}$  or  $b_{ID}$ , the verification in Phase 5 detects  $B' \neq B$  and terminates the protocol.

### Phase 3: Signature Generation and Distribution

- **Challenger's Operations:**
  - Generates signatures  $\sigma_k = \hat{\sigma}_k^x \cdot H_3(v_k, ID)^{B \bmod Q}$  for data  $data$ .
- **Collusion Resistance Analysis:**
  - To forge a signature, the adversary must compromise both  $x$  and  $B$ :
    - \*  $x$  is protected by user private keys and bound to  $s$ .
    - \*  $B$  is distributed via CRT; partial knowledge of  $b_{ID}$  is insufficient for recovery (relies on CRT security).

#### Phase 4: Verification and Combination

- **Challenger's Operations:**

- Verifies  $e(\varsigma_k, h) = e(\hat{\sigma}_k, R \cdot \text{mpk}^{H_0(ID, R)})$  during validation.

- **Collusion Resistance Analysis:**

- If colluders tamper with  $\sigma_k$  or  $\tilde{v}_d$ , the bilinear pairing check fails (relies on collision resistance of hash functions and properties of bilinear maps).

Assume an adversary  $A$  can break collusion resistance with non-negligible probability  $\epsilon$ . We construct an algorithm  $C'$  to solve the CDH problem:

1.  $C'$  simulates the scheme using  $A$ 's queries and embeds a CDH instance into public parameters.
2. When  $A$  forges a signature,  $C'$  extracts the CDH solution from the bilinear map result.
3. By the CDH assumption,  $\epsilon$  is negligible, leading to a contradiction. Hence, collusion resistance holds.

The scheme achieves collusion resistance through:

- **Master Key Protection:** Distributed generation and verification of  $s$  and  $B$ , preventing single-point leakage.
- **Session Key Distribution:** Threshold mechanism based on CRT, requiring colluders to exceed the security threshold.
- **Cryptographic Primitives:** Bilinear map verification and collision-resistant hash functions ensure tamper detection.
- **Dynamic Binding:** Signatures are bound to file identifiers  $\tau$ , preventing replay attacks.

Thus, under the challenge-response model, the scheme resists collusion attacks.
