# Supplementary material for: Identity-based linear homomorphic signature for a restricted combiners’ group for e-commerce
Source: PeerJ journal article supplement (doi:10.7717/peerj-cs.3068), 2025-08-04
Supplement: proof2.pdf [file proof2.pdf]

## Unlinkability Proof

### Game Definition

1. **Setup:** The challenger generates  $params$  and  $msk$ , and registers two users  $U_0$  and  $U_1$  with private keys  $usk_{ID_0}$  and  $usk_{ID_1}$ .
2. **Challenge Phase:** The challenger randomly selects  $b \in \{0,1\}$ , uses  $usk_{ID_b}$  to generate a signature  $\sigma^*$ , and sends  $\sigma^*$  to the adversary.
3. **Adversary Queries:** The adversary can request signatures for other messages or users (excluding  $U_0$  and  $U_1$ ) and perform verifications.
4. **Guess:** The adversary outputs a guess  $b'$ . The scheme is unlinkable if:

$$\left| \Pr[b' = b] - \frac{1}{2} \right| \leq \text{negl}(\lambda).$$

### Key Observations

- **Private Key Randomness:** Each user's  $usk_{ID} = (x, R)$  includes a unique random  $r$  in  $R = h^r$ . Since  $r$  is fresh per user,  $x = r + s \cdot H_0(ID, R)$  is statistically independent across users.
- **Signature Randomization:** Signatures  $\sigma_k = \hat{\sigma}_k^x \cdot H_3(v_k, ID)^{B \bmod Q}$  depend on both  $x$  (user-specific) and  $B \bmod Q$  (session-specific). The term  $H_3(v_k, ID)^{B \bmod Q}$  introduces session randomness, preventing linkage across different signatures.
- **Session Key Obfuscation:** The CRT-based distribution of  $b_{ID} = B \bmod q_{ID}$  ensures that partial knowledge of  $\{b_{ID_j}\}$  does not reveal  $B$  unless  $t$  combiners collude. This threshold mechanism hides user-specific contributions.

### Formal Reduction

Assume an adversary  $\mathcal{A}$  can win the unlinkability game with non-negligible advantage  $\epsilon$ . We construct a solver  $\mathcal{S}$  for the CDH problem:

1.  $\mathcal{S}$  embeds a CDH instance  $(g, h, g^a, h^b)$  into the public parameters and simulates user keys using  $a, b$ .
2. When  $\mathcal{A}$  requests a signature,  $\mathcal{S}$  programs the hash oracles to align with the CDH challenge.
3. If  $\mathcal{A}$  successfully links signatures,  $\mathcal{S}$  extracts  $e(g, h)^{ab}$  from the bilinear pairing results, solving CDH.
4. By the CDH assumption,  $\epsilon$  must be negligible, contradicting  $\mathcal{A}$ 's advantage. Hence, unlinkability holds.

### Critical Analysis

- **Leakage Prevention:** No phase reveals  $s$ ,  $B$ , or deterministic relationships between users' operations. The use of fresh randomness ( $r$ ,  $B$ ) in key generation and signing ensures unlinkability.
- **Verification Anonymity:** The verification equation  $e(\zeta_k, h) = e(\hat{\sigma}_k, R \cdot \text{mpk}^{H_0(ID, R)})$  depends only on public values ( $R, \text{mpk}$ ) and session-specific terms, avoiding user identity exposure.
- **Threshold Security:** The requirement of  $t$  combiners to recover  $B$  ensures that fewer colluders cannot compromise session anonymity.

The scheme achieves unlinkability through:

- Randomized private key generation and session-specific parameters.
- Threshold-based session key distribution via CRT.
- Cryptographic primitives (bilinear maps, collision-resistant hashes) that prevent leakage of user-specific information.
- Dynamic binding of signatures to session-specific terms (e.g.,  $B \bmod Q$ ) rather than user identities.

Under the challenge-response model, the adversary cannot distinguish signatures from different users beyond random guessing, proving the scheme's unlinkability.

## Traceability Proof

### Game Definition

1. **Setup:** The challenger generates  $params$ ,  $msk$ , and registers a set of users  $\mathcal{U}$ . Each user  $U_i$  receives  $usk_{ID_i} = (x_i, R_i)$ .
2. **Adversary Queries:** The adversary can:
  - Request user private keys for any  $ID_j \in \mathcal{U}$ .
  - Request signatures on messages with specified  $ID_j$ .
  - Corrupt combiners to obtain their session keys  $\{b_{ID_j}\}$ .
3. **Challenge:** The adversary outputs a forged signature  $\sigma^*$  on a message  $m^*$ , claiming it cannot be traced to any registered user.
4. **Tracing:** The challenger uses the tracing algorithm to extract an identity  $ID^*$  from  $\sigma^*$ . The scheme is traceable if:

$$\Pr[ID^* \in \mathcal{U} \wedge \text{Verify}(m^*, \sigma^*) = 1] \geq 1 - \text{negl}(\lambda).$$

### Key Mechanisms for Traceability

- **Identity Binding in Private Keys:** Each user's  $usk_{ID} = (x, R)$  is bound to  $ID$  via  $x = r + s \cdot H_0(ID, R)$ . The term  $H_0(ID, R)$  ensures that  $x$  uniquely encodes  $ID$ , and any valid signature must use a valid  $x$  linked to a registered identity.
- **Signature Structure:** Signatures  $\sigma_k = \hat{\sigma}_k^x \cdot H_3(v_k, ID)^{B \bmod Q}$  explicitly include  $ID$  in  $H_3$ . During verification, the challenger can check the consistency of  $ID$  with the public parameters and traced keys.
- **Session Key Recovery via CRT:** The threshold-based recovery of  $B$  requires at least  $t$  honest combiners. If a forged signature uses an invalid  $B$ , the tracing algorithm can identify corrupt combiners by analyzing inconsistencies in  $B'$ .

### Formal Reduction

Assume an adversary  $\mathcal{A}$  can forge an untraceable signature with non-negligible probability  $\epsilon$ . We construct a solver  $\mathcal{S}$  for the DLP in  $G_1$ :

1.  $\mathcal{S}$  simulates the scheme and embeds a DLP instance  $h = g^a$  into the public parameters.
2. When  $\mathcal{A}$  requests a signature for  $ID_j$ ,  $\mathcal{S}$  programs  $H_0(ID_j, R_j)$  to align with the DLP challenge.

3. If  $\mathcal{A}$  outputs a forged  $\sigma^*$ ,  $\mathcal{S}$  extracts  $x^*$  from  $\hat{\sigma}_k$  via:

$$e(\hat{\sigma}_k, h) = e(g^{x^*}, h) \implies x^* = \log_g \hat{\sigma}_k.$$

Since  $x^* = r + s \cdot H_0(ID^*, R^*)$ ,  $\mathcal{S}$  solves  $a$  from  $h = g^a$  using the extracted  $x^*$ .

4. By the DLP assumption,  $\epsilon$  must be negligible, contradicting  $\mathcal{A}$ 's success. Hence, traceability holds.

### Critical Analysis

- **Non-Frameability:** Even if the adversary corrupts users, they cannot forge signatures for honest users because  $x_i$  depends on  $s$  (unknown to the adversary).
- **Threshold Security:** The CRT-based recovery of  $B$  ensures that corrupting fewer than  $t$  combiners does not compromise  $B$ , preventing fake session keys from being accepted.
- **Public Verifiability:** The verification equation  $e(\varsigma_k, h) = e(\hat{\sigma}_k, R \cdot mpk^{H_0(ID, R)})$  ensures that only valid  $ID$ -bound signatures pass verification.

The scheme achieves traceability through:

- Cryptographic binding of user identities to private keys via  $H_0(ID, R)$ .
- Explicit inclusion of  $ID$  in signature components and hash functions.
- Threshold mechanisms for session key recovery, limiting collusion impact.

Under the challenge-response model, any forged signature can be traced to a registered user with overwhelming probability, proving the scheme's traceability.
