# Supplementary material for: Identity-based linear homomorphic signature for a restricted combiners’ group for e-commerce
Source: PeerJ Comput Sci. 2025 Aug 4;11:e3068. doi: 10.7717/peerj-cs.3068 (PMC12453756; doi:10.7717/peerj-cs.3068)
Supplement: Supplemental Information 1 [file peerj-cs-11-3068-s001.xlsx]

## Sheet: t=m
n	Boneh's Scheme (2009)	Li's Scheme (2018)	Chang's Scmeme (2019)	Li's Scheme (2022)	Lin's Scheme (2021)	Our Scheme
9	0.156775	0.158588	0.161109	0.139628	0.159099	0.141777
10	0.146027	0.147871	0.150366	0.126736	0.148351	0.128885
11	0.137427	0.139297	0.141771	0.115993	0.139751	0.118142
12	0.128827	0.130724	0.133177	0.10525	0.131151	0.107399
13	0.124525	0.126437	0.12888	0.098804	0.126849	0.100953
14	0.120222	0.12215	0.124582	0.092358	0.122546	0.094507
15	0.11592	0.117864	0.120285	0.085912	0.118244	0.088061
16	0.113766	0.11572	0.118136	0.081615	0.11609	0.083764
17	0.111612	0.113577	0.115988	0.077318	0.113936	0.079466
18	0.109458	0.111434	0.113839	0.07302	0.111782	0.075169
19	0.107304	0.10929	0.111691	0.068723	0.109628	0.070872
20	0.107299	0.10929	0.111691	0.066575	0.109623	0.068723
21	0.105145	0.107147	0.109542	0.062277	0.107469	0.064426
22	0.10514	0.107147	0.109542	0.060129	0.107464	0.062277
23	0.105134	0.107147	0.109542	0.05798	0.107459	0.060129
24	0.105129	0.107147	0.109542	0.055831	0.107454	0.05798
25	0.105124	0.107147	0.109542	0.053683	0.107448	0.055831
26	0.105119	0.107147	0.109542	0.051534	0.107443	0.053683
27	0.105114	0.107147	0.109542	0.049386	0.107438	0.051534
28	0.107257	0.10929	0.111691	0.049386	0.109581	0.051534
29	0.107252	0.10929	0.111691	0.047237	0.109576	0.049386
30	0.107246	0.10929	0.111691	0.045088	0.109571	0.047237
31	0.10939	0.111434	0.113839	0.045088	0.111714	0.047237
32	0.109385	0.111434	0.113839	0.04294	0.111709	0.045088
33	0.111528	0.113577	0.115988	0.04294	0.113852	0.045088
34	0.111523	0.113577	0.115988	0.040791	0.113847	0.04294
35	0.113666	0.11572	0.118136	0.040791	0.11599	0.04294
36	0.113661	0.11572	0.118136	0.038642	0.115985	0.040791
37	0.115804	0.117864	0.120285	0.038642	0.118129	0.040791
38	0.115799	0.117864	0.120285	0.036494	0.118123	0.038642
39	0.117942	0.120007	0.122434	0.036494	0.120267	0.038642
40	0.120086	0.12215	0.124582	0.036494	0.12241	0.038642
41	0.12008	0.12215	0.124582	0.034345	0.122405	0.036494
42	0.122224	0.124294	0.126731	0.034345	0.124548	0.036494
43	0.124367	0.126437	0.12888	0.034345	0.126692	0.036494
44	0.124362	0.126437	0.12888	0.032197	0.126686	0.034345
45	0.126505	0.128581	0.131028	0.032197	0.12883	0.034345
46	0.128649	0.130724	0.133177	0.032197	0.130973	0.034345
47	0.128644	0.130724	0.133177	0.030048	0.130968	0.032197
48	0.130787	0.132867	0.135325	0.030048	0.133111	0.032197
49	0.13293	0.135011	0.137474	0.030048	0.135255	0.032197
50	0.135074	0.137154	0.139623	0.030048	0.137398	0.032197
51	0.137217	0.139297	0.141771	0.030048	0.139541	0.032197
52	0.137212	0.139297	0.141771	0.027899	0.139536	0.030048
53	0.139355	0.141441	0.14392	0.027899	0.14168	0.030048
54	0.141499	0.143584	0.146069	0.027899	0.143823	0.030048
55	0.143642	0.145728	0.148217	0.027899	0.145966	0.030048
56	0.145785	0.147871	0.150366	0.027899	0.14811	0.030048
57	0.14578	0.147871	0.150366	0.025751	0.148104	0.027899
58	0.147923	0.150014	0.152514	0.025751	0.150248	0.027899
59	0.150067	0.152158	0.154663	0.025751	0.152391	0.027899
60	0.15221	0.154301	0.156812	0.025751	0.154535	0.027899
61	0.154354	0.156445	0.15896	0.025751	0.156678	0.027899
62	0.156497	0.158588	0.161109	0.025751	0.158821	0.027899
63	0.156492	0.158588	0.161109	0.023602	0.158816	0.025751
64	0.158635	0.160731	0.163258	0.023602	0.160959	0.025751

## Sheet: t=m%3
n	Boneh's Scheme (2009)	Li's Scheme (2018)	Chang's Scmeme (2019)	Li's Scheme (2022)	Lin's Scheme (2021)	Our Scheme
9	0.161522	0.163461	0.165979	0.143848	0.163829	0.146062
10	0.15045	0.152415	0.154912	0.130568	0.152758	0.132781
11	0.141592	0.143578	0.146058	0.1195	0.143899	0.121714
12	0.132734	0.134741	0.137204	0.108433	0.135041	0.110646
13	0.128303	0.130323	0.132777	0.101792	0.13061	0.104006
14	0.123871	0.125905	0.12835	0.095152	0.126179	0.097365
15	0.11944	0.121486	0.123923	0.088511	0.121747	0.090725
16	0.117222	0.119277	0.121709	0.084085	0.11953	0.086298
17	0.115005	0.117068	0.119496	0.079658	0.117312	0.081871
18	0.112787	0.114859	0.117282	0.075231	0.115094	0.077444
19	0.110569	0.112649	0.115069	0.070804	0.112876	0.073017
20	0.110565	0.112649	0.115069	0.06859	0.112872	0.070804
21	0.108347	0.11044	0.112855	0.064163	0.110654	0.066377
22	0.108343	0.11044	0.112855	0.06195	0.11065	0.064163
23	0.108338	0.11044	0.112855	0.059736	0.110646	0.06195
24	0.108334	0.11044	0.112855	0.057523	0.110641	0.059736
25	0.10833	0.11044	0.112855	0.055309	0.110637	0.057523
26	0.108325	0.11044	0.112855	0.053096	0.110633	0.055309
27	0.108321	0.11044	0.112855	0.050882	0.110629	0.053096
28	0.11053	0.112649	0.115069	0.050882	0.112838	0.053096
29	0.110526	0.112649	0.115069	0.048669	0.112833	0.050882
30	0.110522	0.112649	0.115069	0.046455	0.112829	0.048669
31	0.112731	0.114859	0.117282	0.046455	0.115038	0.048669
32	0.112727	0.114859	0.117282	0.044242	0.115034	0.046455
33	0.114936	0.117068	0.119496	0.044242	0.117243	0.046455
34	0.114932	0.117068	0.119496	0.042028	0.117239	0.044242
35	0.117141	0.119277	0.121709	0.042028	0.119448	0.044242
36	0.117136	0.119277	0.121709	0.039815	0.119444	0.042028
37	0.119346	0.121486	0.123923	0.039815	0.121653	0.042028
38	0.119341	0.121486	0.123923	0.037601	0.121649	0.039815
39	0.121551	0.123695	0.126136	0.037601	0.123858	0.039815
40	0.12376	0.125905	0.12835	0.037601	0.126067	0.039815
41	0.123755	0.125905	0.12835	0.035388	0.126063	0.037601
42	0.125965	0.128114	0.130563	0.035388	0.128272	0.037601
43	0.128174	0.130323	0.132777	0.035388	0.130481	0.037601
44	0.12817	0.130323	0.132777	0.033175	0.130477	0.035388
45	0.130379	0.132532	0.13499	0.033175	0.132686	0.035388
46	0.132588	0.134741	0.137204	0.033175	0.134895	0.035388
47	0.132584	0.134741	0.137204	0.030961	0.134891	0.033175
48	0.134793	0.13695	0.139417	0.030961	0.1371	0.033175
49	0.137002	0.13916	0.141631	0.030961	0.139309	0.033175
50	0.139211	0.141369	0.143844	0.030961	0.141519	0.033175
51	0.14142	0.143578	0.146058	0.030961	0.143728	0.033175
52	0.141416	0.143578	0.146058	0.028748	0.143723	0.030961
53	0.143625	0.145787	0.148271	0.028748	0.145933	0.030961
54	0.145834	0.147996	0.150485	0.028748	0.148142	0.030961
55	0.148044	0.150206	0.152698	0.028748	0.150351	0.030961
56	0.150253	0.152415	0.154912	0.028748	0.15256	0.030961
57	0.150249	0.152415	0.154912	0.026534	0.152556	0.028748
58	0.152458	0.154624	0.157125	0.026534	0.154765	0.028748
59	0.154667	0.156833	0.159338	0.026534	0.156974	0.028748
60	0.156876	0.159042	0.161552	0.026534	0.159184	0.028748
61	0.159085	0.161252	0.163765	0.026534	0.161393	0.028748
62	0.161294	0.163461	0.165979	0.026534	0.163602	0.028748
63	0.16129	0.163461	0.165979	0.024321	0.163598	0.026534
64	0.163499	0.16567	0.168192	0.024321	0.165807	0.026534
