# Supplementary material for: Identity-based linear homomorphic signature for a restricted combiners’ group for e-commerce
Source: PeerJ Comput Sci. 2025 Aug 4;11:e3068. doi: 10.7717/peerj-cs.3068 (PMC12453756; doi:10.7717/peerj-cs.3068)
Supplement: Supplemental Information 2 [file peerj-cs-11-3068-s002.xlsx]

## Sheet: m
n	Boneh's Scheme (2009)	Lin's Scheme (2018)	Chang's Scmeme (2019)	Lin's Scheme (2021)	Li's Scheme (2022)	Our Scheme
11	0.190134s	0.330278s	0.330278s	0.199420s	0.148700s	0.152801s
12	0.183568s	0.312811s	0.312811s	0.192855s	0.137772s	0.141894s
13	0.179189s	0.299710s	0.299710s	0.188475s	0.129030s	0.133169s
14	0.174809s	0.286609s	0.286609s	0.184095s	0.120287s	0.124444s
15	0.172615s	0.277876s	0.277876s	0.181901s	0.113730s	0.117900s
16	0.170421s	0.269142s	0.269142s	0.179707s	0.107174s	0.111356s
17	0.170412s	0.264775s	0.264775s	0.179698s	0.102803s	0.106993s
18	0.168218s	0.256041s	0.256041s	0.177504s	0.096246s	0.100450s
19	0.170395s	0.256041s	0.256041s	0.179681s	0.094060s	0.098268s
20	0.170386s	0.251674s	0.251674s	0.179673s	0.089689s	0.093906s
21	0.170378s	0.247308s	0.247308s	0.179664s	0.085318s	0.089543s
22	0.172555s	0.247308s	0.247308s	0.181841s	0.083132s	0.087362s
23	0.172546s	0.242941s	0.242941s	0.181833s	0.078761s	0.082999s
24	0.174723s	0.242941s	0.242941s	0.184010s	0.076576s	0.080818s
25	0.176900s	0.242941s	0.242941s	0.186187s	0.074390s	0.078637s
26	0.179077s	0.242941s	0.242941s	0.188364s	0.072204s	0.076455s
27	0.181254s	0.242941s	0.242941s	0.190541s	0.070019s	0.074274s
28	0.183431s	0.242941s	0.242941s	0.192718s	0.067833s	0.072093s
29	0.185608s	0.242941s	0.242941s	0.194895s	0.065648s	0.069911s
30	0.189971s	0.247308s	0.247308s	0.199257s	0.065648s	0.069911s
31	0.192148s	0.247308s	0.247308s	0.201434s	0.063462s	0.067730s
32	0.194325s	0.247308s	0.247308s	0.203611s	0.061276s	0.065549s
33	0.198687s	0.251674s	0.251674s	0.207974s	0.061276s	0.065549s
34	0.200864s	0.251674s	0.251674s	0.210151s	0.059091s	0.063368s
35	0.205227s	0.256041s	0.256041s	0.214513s	0.059091s	0.063368s
36	0.207404s	0.256041s	0.256041s	0.216690s	0.056905s	0.061186s
37	0.209581s	0.256041s	0.256041s	0.218867s	0.054720s	0.059005s
38	0.213943s	0.260408s	0.260408s	0.223230s	0.054720s	0.059005s
39	0.218306s	0.264775s	0.264775s	0.227592s	0.054720s	0.059005s
40	0.220483s	0.264775s	0.264775s	0.229769s	0.052534s	0.056824s
41	0.224846s	0.269142s	0.269142s	0.234132s	0.052534s	0.056824s
42	0.227023s	0.269142s	0.269142s	0.236309s	0.050349s	0.054642s
43	0.231385s	0.273509s	0.273509s	0.240672s	0.050349s	0.054642s
44	0.235748s	0.277876s	0.277876s	0.245034s	0.050349s	0.054642s
45	0.237925s	0.277876s	0.277876s	0.247211s	0.048163s	0.052461s
46	0.242287s	0.282243s	0.282243s	0.251574s	0.048163s	0.052461s
47	0.246650s	0.286609s	0.286609s	0.255936s	0.048163s	0.052461s
48	0.248827s	0.286609s	0.286609s	0.258113s	0.045977s	0.050280s
49	0.253190s	0.290976s	0.290976s	0.262476s	0.045977s	0.050280s
50	0.257552s	0.295343s	0.295343s	0.266839s	0.045977s	0.050280s
51	0.261915s	0.299710s	0.299710s	0.271201s	0.045977s	0.050280s
52	0.264092s	0.299710s	0.299710s	0.273378s	0.043792s	0.048099s
53	0.268454s	0.304077s	0.304077s	0.277741s	0.043792s	0.048099s
54	0.272817s	0.308444s	0.308444s	0.282103s	0.043792s	0.048099s
55	0.277179s	0.312811s	0.312811s	0.286466s	0.043792s	0.048099s
56	0.279356s	0.312811s	0.312811s	0.288643s	0.041606s	0.045917s
57	0.283719s	0.317178s	0.317178s	0.293005s	0.041606s	0.045917s
58	0.288082s	0.321544s	0.321544s	0.297368s	0.041606s	0.045917s
59	0.292444s	0.325911s	0.325911s	0.301731s	0.041606s	0.045917s
60	0.296807s	0.330278s	0.330278s	0.306093s	0.041606s	0.045917s
61	0.298984s	0.330278s	0.330278s	0.308270s	0.039421s	0.043736s
62	0.303346s	0.334645s	0.334645s	0.312633s	0.039421s	0.043736s

## Sheet: m%3
n	Boneh's Scheme (2009)	Lin's Scheme (2018)	Chang's Scmeme (2019)	Lin's Scheme (2021)	Li's Scheme (2022)	Our Scheme
11	0.151302s	0.230690s	0.230690s	0.160718s	0.087886s	0.092007s
12	0.151287s	0.226309s	0.226309s	0.160703s	0.083498s	0.087634s
13	0.151272s	0.221928s	0.221928s	0.160687s	0.079109s	0.083261s
14	0.151257s	0.217547s	0.217547s	0.160672s	0.074721s	0.078888s
15	0.153435s	0.217547s	0.217547s	0.162851s	0.072527s	0.076701s
16	0.155614s	0.217547s	0.217547s	0.165030s	0.070333s	0.074515s
17	0.157793s	0.217547s	0.217547s	0.167209s	0.068138s	0.072328s
18	0.159972s	0.217547s	0.217547s	0.169388s	0.065944s	0.070142s
19	0.162151s	0.217547s	0.217547s	0.171567s	0.063750s	0.067955s
20	0.164330s	0.217547s	0.217547s	0.173746s	0.061556s	0.065769s
21	0.166509s	0.217547s	0.217547s	0.175925s	0.059362s	0.063582s
22	0.168688s	0.217547s	0.217547s	0.178103s	0.057168s	0.061396s
23	0.173061s	0.221928s	0.221928s	0.182477s	0.057168s	0.061396s
24	0.175240s	0.221928s	0.221928s	0.184655s	0.054973s	0.059209s
25	0.179613s	0.226309s	0.226309s	0.189029s	0.054973s	0.059209s
26	0.181792s	0.226309s	0.226309s	0.191207s	0.052779s	0.057023s
27	0.183971s	0.226309s	0.226309s	0.193386s	0.050585s	0.054836s
28	0.186165s	0.230690s	0.230690s	0.195580s	0.052779s	0.057023s
29	0.188344s	0.230690s	0.230690s	0.197759s	0.050585s	0.054836s
30	0.192717s	0.235070s	0.235070s	0.202132s	0.050585s	0.054836s
31	0.194896s	0.235070s	0.235070s	0.204311s	0.048391s	0.052649s
32	0.199269s	0.239451s	0.239451s	0.208684s	0.048391s	0.052649s
33	0.201448s	0.239451s	0.239451s	0.210863s	0.046197s	0.050463s
34	0.205821s	0.243832s	0.243832s	0.215236s	0.046197s	0.050463s
35	0.210194s	0.248212s	0.248212s	0.219609s	0.046197s	0.050463s
36	0.212373s	0.248212s	0.248212s	0.221788s	0.044003s	0.048276s
37	0.216746s	0.252593s	0.252593s	0.226161s	0.044003s	0.048276s
38	0.221119s	0.256974s	0.256974s	0.230535s	0.044003s	0.048276s
39	0.223298s	0.256974s	0.256974s	0.232713s	0.041808s	0.046090s
40	0.227671s	0.261354s	0.261354s	0.237087s	0.041808s	0.046090s
41	0.232044s	0.265735s	0.265735s	0.241460s	0.041808s	0.046090s
42	0.236417s	0.270116s	0.270116s	0.245833s	0.041808s	0.046090s
43	0.238596s	0.270116s	0.270116s	0.248012s	0.039614s	0.043903s
44	0.242969s	0.274497s	0.274497s	0.252385s	0.039614s	0.043903s
45	0.247342s	0.278877s	0.278877s	0.256758s	0.039614s	0.043903s
46	0.251715s	0.283258s	0.283258s	0.261131s	0.039614s	0.043903s
47	0.256088s	0.287639s	0.287639s	0.265504s	0.039614s	0.043903s
48	0.258267s	0.287639s	0.287639s	0.267683s	0.037420s	0.041717s
49	0.262640s	0.292019s	0.292019s	0.272056s	0.037420s	0.041717s
50	0.267013s	0.296400s	0.296400s	0.276429s	0.037420s	0.041717s
51	0.271386s	0.300781s	0.300781s	0.280802s	0.037420s	0.041717s
52	0.275759s	0.305161s	0.305161s	0.285175s	0.037420s	0.041717s
53	0.277938s	0.305161s	0.305161s	0.287354s	0.035226s	0.039530s
54	0.282311s	0.309542s	0.309542s	0.291727s	0.035226s	0.039530s
55	0.286685s	0.313923s	0.313923s	0.296100s	0.035226s	0.039530s
56	0.291058s	0.318304s	0.318304s	0.300473s	0.035226s	0.039530s
57	0.295431s	0.322684s	0.322684s	0.304846s	0.035226s	0.039530s
58	0.299804s	0.327065s	0.327065s	0.309219s	0.035226s	0.039530s
59	0.304177s	0.331446s	0.331446s	0.313592s	0.035226s	0.039530s
60	0.306356s	0.331446s	0.331446s	0.315771s	0.033032s	0.037344s
61	0.308550s	0.335826s	0.335826s	0.317966s	0.035226s	0.039530s
62	0.310729s	0.335826s	0.335826s	0.320144s	0.033032s	0.037344s
